# Supplementary material
Source: PubMed Central journal article supplement (PMC3075753)
Supplement: pp.110.166330_1.pdf [file pp.110.166330_1.pdf]

# Callose Synthase *GSL7* Is Necessary for Normal Phloem Transport and Inflorescence Growth in *Arabidopsis*<sup>1</sup>

D.H. Paul Barratt, Katherina Kölling, Alexander Graf, Marilyn Pike, Grant Calder, Kim Findlay, Samuel C. Zeeman and Alison M. Smith

## Supplemental Figures and Tables

**Supplemental Figure S1.** Location in roots of transcripts for *SUS5*, *SUS6* and *GSL7*.

**Supplemental Figure S2.** Absence of *GSL7* transcript in two lines carrying T-DNA insertions in the *GSL7* gene.

**Supplemental Figure S3.** Growth of wild-type and *gs17* mutant plants.

**Supplemental Figure S4.** Loss of starch from the inflorescence and altered starch turnover in the leaves of the *gs17* mutant.

**Supplemental Table S1.** Top twenty genes co-expressed with *SUS5* (At5g37180), from Atted-II.

**Supplemental Table S2.** Top forty genes co-expressed with *SUS5* (At5g37180), from CSB.DB.

**Supplemental Table S3.** Weights of rosettes, leaves and stem bases of wild-type and mutant plants.

**Supplemental Table S4.** Starvation marker genes used in this study.

**Supplemental Table S5.** Primers used in this study.

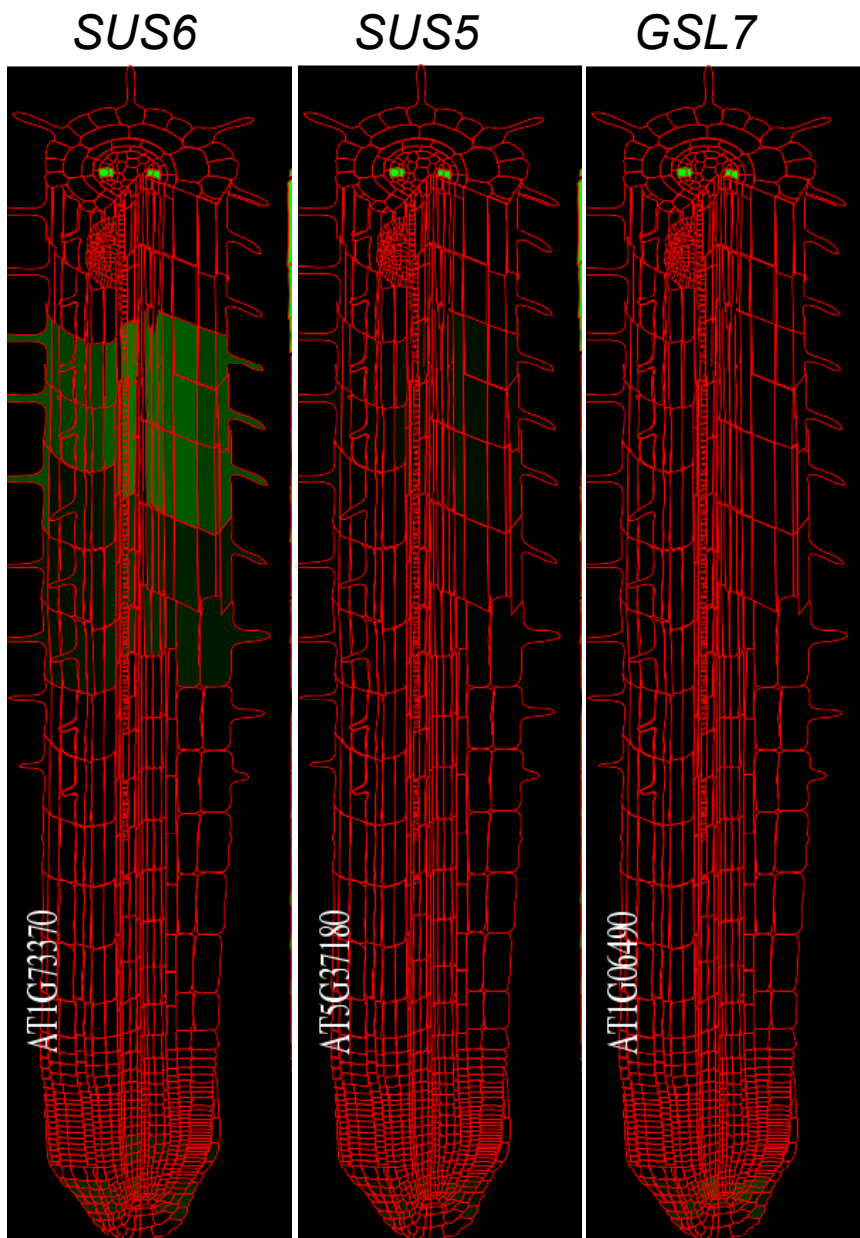

**Supplemental Figure S1.** Location in roots of transcripts for *SUS5*, *SUS6*, and *GSL7*.

Data are from the Deconvolved Root Expression Map Visualizer tool in the Arex database (<http://www.arexdb.org/>). Methods and cautions on interpretation are presented in Birnbaum et al. (2003), Brady et al. (2007), and Cartwright et al. (2009).

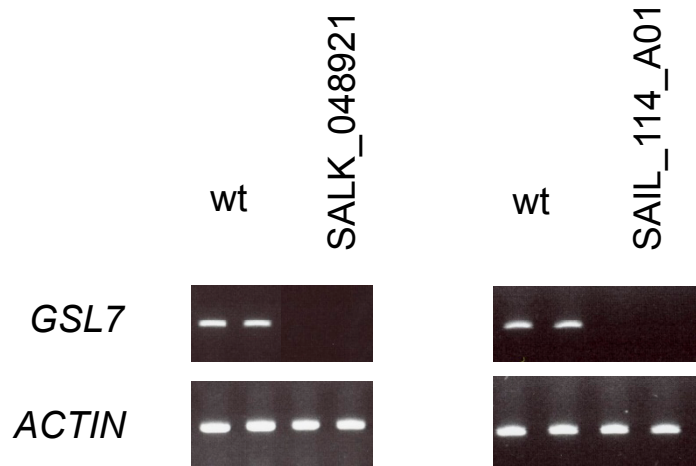

**Supplemental Figure S2.** Absence of *GSL7* transcript in two lines carrying T-DNA insertions in the *GSL7* gene.

Two T-DNA insertion lines were obtained from public collections. Wild-type (wt) lines were selected from the segregating F2 population from which mutants were selected. Total RNA was isolated from the basal 4 cm of flowering stems of 6 to 7-week-old plants. Two independent samples, each of two stem sections, were prepared for each line. First-strand cDNA was synthesised from 5 $\mu$ g of total RNA (Bieniawska et al., 2007). Primers for an *ACTIN* gene were used to verify the quality of the cDNA and to ensure equal loadings of cDNA templates. RT-PCR was performed using primers given in Supplemental Table S5. Amplification cycles of 24 and 30 were performed for *ACTIN* and *GSL7* respectively. Ten  $\mu$ L of each product were separated by electrophoresis on a 1% w/v agarose gel and stained with ethidium bromide.

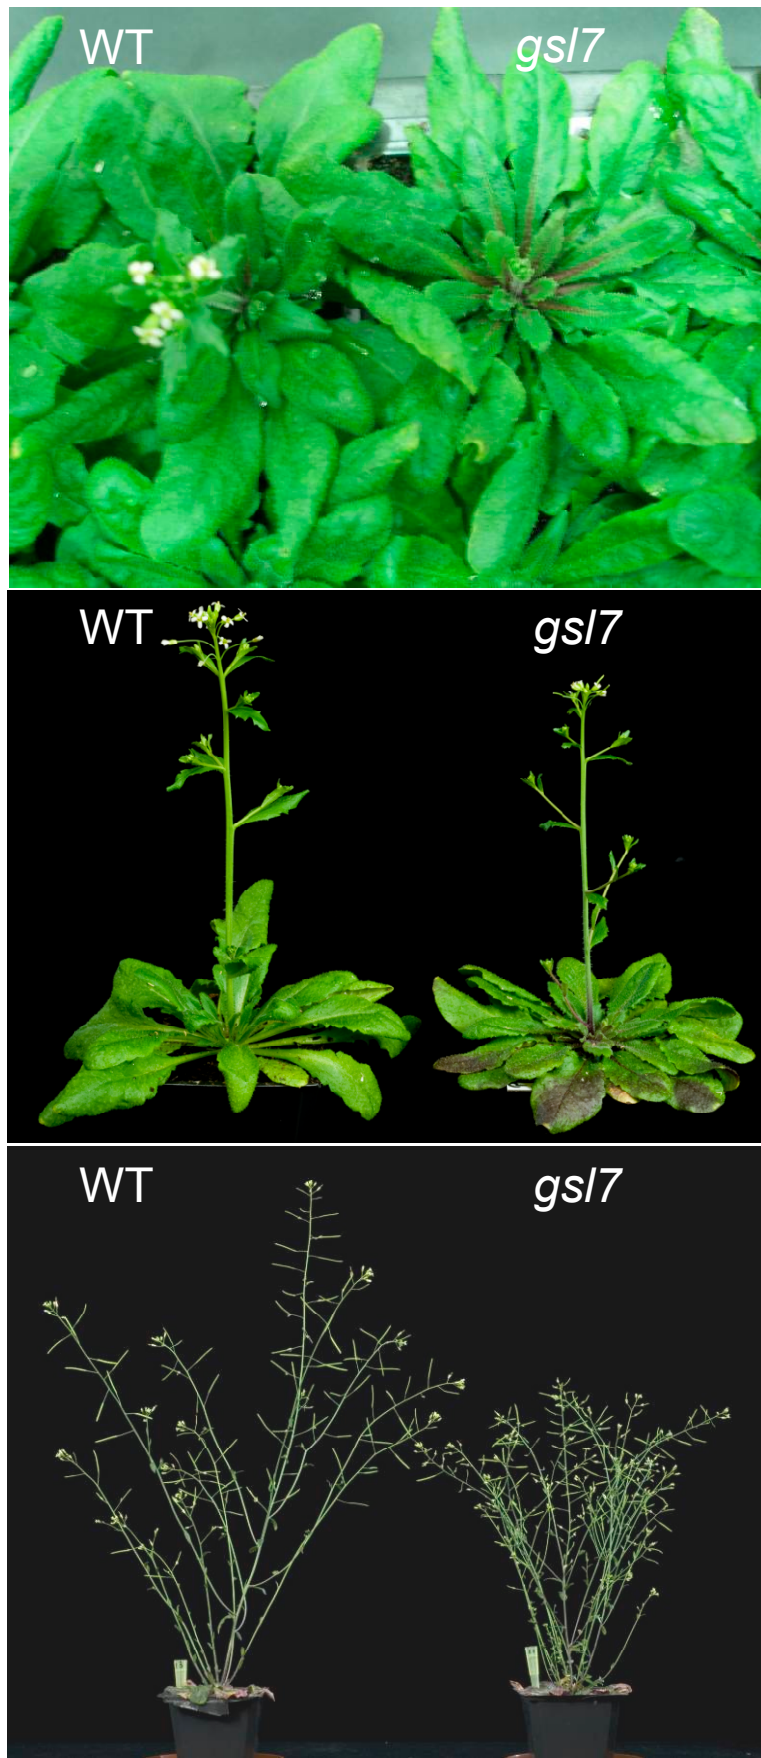

**Supplemental Figure S3.** Growth of wild-type and *gs17* mutant plants.

All plants were grown with 12 h light, 12 h dark. In each picture wild-type plants are on the left; *gs17* plants are on the right. Top: onset of flowering. The *gs17* plant has more purple pigmentation than the wild-type plant. Middle: plants at six weeks old. The flowering stem of the wild-type plant is 13 cm high. Bottom: plants at eight weeks old.

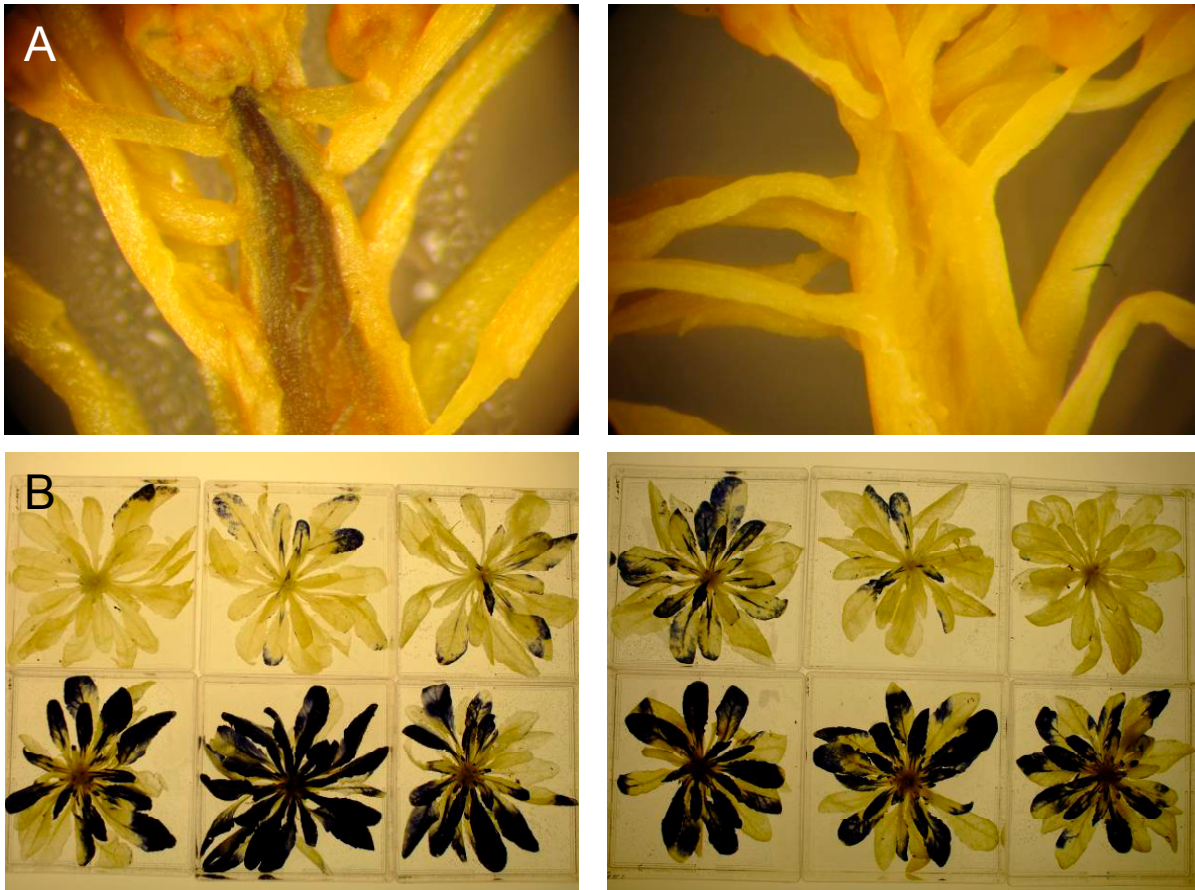

**Supplemental Figure S4.** Loss of starch from the inflorescence and altered starch turnover in the leaves of the *gs17* mutant.

Seven-week-old plants were harvested immediately before the end of the night. Samples were decolorized in ethanol and stained for starch with Lugol's iodine solution.

(A) The inside of the apex of the flowering stem of a wild-type (left) and a mutant (right) plant. The presence of starch in wild-type plants and its near absence in mutant plants at this time point was observed consistently on different batches of plants.

(B) Rosettes after removal of the flowering stem. Plants were washed in water for 24 h after iodine staining. The upper row is wild-type plants. In the lower row the left three plants are *gs17-1* mutants; the right three plants are *gs17-2* mutants.



### Supplemental Table S1.

Top 20 Genes Co-expressed with *SUS5* (At5g37180), from Atted-II.

Data are from the *Arabidopsis thaliana* trans-factor and cis-element prediction database, <http://atted.jp/>.

| Rank | MR   | CORR | Locus     | Gene description                                                                     |
|------|------|------|-----------|--------------------------------------------------------------------------------------|
| 1    | 3.5  | 0.52 | At1g73370 | SUS6 (SUCROSE SYNTHASE 6)                                                            |
| 2    | 5.0  | 0.44 | At1g06490 | ATGSL07 (glucan synthase-like 7)                                                     |
| 3    | 8.5  | 0.45 | At3g58350 | mepirin and TRAF homology domain-containing protein / MATH domain-containing protein |
| 4    | 19.3 | 0.43 | At5g38770 | AtGDU7 ( <i>Arabidopsis thaliana</i> GLUTAMINE DUMPER 7)                             |
| 5    | 19.8 | 0.43 | At4g33810 | glycosyl hydrolase family 10 protein                                                 |
| 6    | 23.6 | 0.40 | At3g18670 | ankyrin repeat family protein                                                        |
| 7    | 25.8 | 0.44 | At4g24430 | lyase                                                                                |
| 8    | 29.7 | 0.47 | 267343_at | At2g44255; At2g44260                                                                 |
| 9    | 33.7 | 0.43 | At4g35970 | APX5 (ASCORBATE PEROXIDASE 5)                                                        |
| 10   | 36.9 | 0.42 | At2g17940 | unknown protein                                                                      |
| 11   | 38.1 | 0.38 | At5g11990 | proline-rich family protein                                                          |
| 12   | 38.2 | 0.41 | At2g27140 | heat shock family protein                                                            |
| 13   | 39.0 | 0.44 | At1g02950 | ATGSTF4 (GLUTATHIONE S-TRANSFERASE F4)                                               |
| 14   | 43.6 | 0.44 | At4g15093 | catalytic LigB subunit of aromatic ring-opening dioxygenase family                   |
| 15   | 44.2 | 0.42 | At3g08490 | unknown protein                                                                      |
| 16   | 47.1 | 0.39 | At5g56720 | malate dehydrogenase, cytosolic, putative                                            |
| 17   | 52.5 | 0.36 | At1g75720 | unknown protein                                                                      |
| 18   | 56.5 | 0.43 | At3g56230 | speckle-type POZ protein-related                                                     |
| 19   | 58.5 | 0.42 | At5g03260 | LAC11 (laccase 11)                                                                   |
| 20   | 60.5 | 0.39 | At3g49070 | unknown protein                                                                      |

MR: mutual rank, based on Pearson's correlation coefficient (see [http://atted.jp/help/coex\\_cal.shtml](http://atted.jp/help/coex_cal.shtml)). CORR: Pearson's correlation coefficient.

When genes co-expressed with *SUS6* are searched, ATGSL07 (glucan synthase-like 7) ranks 2 on the list, with a CORR value of 0.51, MR value 3.7.

## Supplemental Table S2.

Top 40 Genes Co-expressed with *SUS5* (At5g37180), from CSB.DB.

Data are from AthCoR@CSB.DB - The *A.thaliana* Co-Response Database ([http://csbdb.mpimp-golm.mpg.de/csbdb/dbcor/ath/ath\\_tsgq.html](http://csbdb.mpimp-golm.mpg.de/csbdb/dbcor/ath/ath_tsgq.html)), searching “developmental series”.

| Rank | Spearman | Locus     | Gene description                                                                   |
|------|----------|-----------|------------------------------------------------------------------------------------|
| 1    | 0.8033   | At1g73370 | SuSy / arab6 / SuSy1 [SUS6]                                                        |
| 2    | 0.6673   | At5g56540 | arabinogalactan-protein (AGP14)                                                    |
| 3    | 0.6475   | At1g76200 | expressed protein                                                                  |
| 4    | 0.6465   | At3g27200 | plastocyanin-like domain-containing protein                                        |
| 5    | 0.6384   | At1g14240 | atapy3-apyrase                                                                     |
| 6    | 0.6372   | At1g52910 | expressed protein                                                                  |
| 7    | 0.6306   | At1g62990 | homeodomain transcription factor (KNAT7)                                           |
| 8    | 0.626    | At1g06490 | glucan synthase, putative, AtGsl07                                                 |
| 9    | 0.6247   | At1g08340 | rac GTPase activating protein, putative                                            |
| 10   | 0.6111   | At3g13590 | DC1 domain-containing protein                                                      |
| 11   | 0.6103   | At5g04470 | expressed protein                                                                  |
| 12   | 0.5979   | At3g14570 | hypothetical protein, glucan synthase, putative, AtGsl04                           |
| 13   | 0.5917   | At5g04890 | small heat shock-like protein (RTM2)                                               |
| 14   | 0.5903   | At3g44730 | kinesin motor protein-related                                                      |
| 15   | 0.5889   | At4g38470 | protein kinase like protein protein kinase 6 (EC 2.7.1.-) – soybean, PIR2:S29851   |
| 16   | 0.5881   | At3g21550 | expressed protein                                                                  |
| 17   | 0.5874   | At1g50890 | expressed protein                                                                  |
| 18   | 0.5836   | At3g22400 | putative lipoxygenase similar to lipoxygenase GB:AAB67865 from [Solanum tuberosum] |
| 19   | 0.5827   | At3g03070 | NADH-ubiquinone oxidoreductase-related                                             |
| 20   | 0.5817   | 253227_at | no agi hits found                                                                  |
| 21   | 0.5817   | At1g26820 | ribonuclease 3 (RNS3)                                                              |
| 22   | 0.579    | At2g35120 | d glycine cleavage system H protein, mitochondrial, putative                       |
| 23   | 0.5779   | At5g65660 | hydroxyproline-rich glycoprotein family protein                                    |
| 24   | 0.5761   | At3g17420 | serine/threonine protein kinase, putative                                          |
| 25   | 0.5757   | At3g54860 | vacuolar protein sorting protein 33a                                               |
| 26   | 0.5736   | At3g52370 | beta-Ig-H3 domain-containing protein / fasciclin domain -containing protein        |
| 27   | 0.5718   | At1g26450 | beta-1,3-glucanase-related                                                         |
| 28   | 0.5667   | At1g80950 | phospholipid/glycerol acyltransferase family protein                               |
| 29   | 0.5664   | At4g00230 | subtilisin-like serine protease XSP1                                               |
| 30   | 0.566    | At5g23170 | serine/threonine protein kinase-like protein                                       |
| 31   | 0.5659   | At2g02510 | expressed protein                                                                  |
| 32   | 0.5648   | At1g51540 | kelch repeat-containing protein                                                    |
| 33   | 0.5617   | At1g03920 | putative protein kinase                                                            |
| 34   | 0.56     | At5g53590 | auxin-responsive family protein                                                    |
| 35   | 0.5578   | At5g55550 | RNA recognition motif (RRM)-containing protein                                     |
| 36   | 0.5545   | At4g18425 | expressed protein  contains Pfam profile PF05078:                                  |
| 37   | 0.5539   | At5g15490 | b UDP-glucose 6-dehydrogenase, putative (UGD3)                                     |

|    |        |           |                                   |
|----|--------|-----------|-----------------------------------|
| 38 | 0.553  | At2g33310 | auxin regulated protein (IAA13)   |
| 39 | 0.551  | At5g65390 | arabinogalactan-protein (AGP7)    |
| 40 | 0.5507 | At3g21240 | putative 4-coumarate:CoA ligase 2 |

When genes co-expressed with *SUS6* are searched, ATGSL07 (glucan synthase-like 7) ranks 2 on the list, with a Spearman correlation coefficient of 0.7548. ATGSL04 (glucan synthase-like 4) ranks 14 on the list, Spearman correlation coefficient of 0.6482.



### Supplemental Table S3

Weights of rosettes, leaves and stem bases of wild-type and mutant plants.

|                                              | Wild-type                |                                | <i>gs/7</i> mutant            |                                |
|----------------------------------------------|--------------------------|--------------------------------|-------------------------------|--------------------------------|
|                                              | Fresh weight<br>(g)      | Dry weight <sup>c</sup><br>(g) | Fresh weight<br>(g)           | Dry weight <sup>c</sup><br>(g) |
| Rosette <sup>a</sup>                         | 1.44 ± 0.31 <sup>d</sup> | 0.163 ±<br>0.032               | 1.22 ± 0.19 <sup>e</sup>      | 0.140 ±<br>0.028               |
| Root system <sup>a</sup>                     | 0.37 ± 0.07              | 0.030 ±<br>0.004               | 0.32 ± 0.07                   | 0.027 ±<br>0.004               |
| Basal 4 cm of flowering<br>stem <sup>b</sup> | 0.137 ± 0.012            | n.d. <sup>g</sup>              | 0.099 ±<br>0.006 <sup>f</sup> | n.d.                           |

<sup>a</sup>Rosettes and root systems were harvested from plants grown with 12 h light, 12 h dark in a 1:1 mixture of sand and Terragreen medium (Oil-Dri, <http://www.oildri.com>) supplemented with a slow-release fertilizer. Plants were 35 days old at the time of harvest: flowering stems were approximately one cm high.

<sup>b</sup>Flowering stems were harvested from plants grown with 12 h light, 12 h dark in compost. Plants were 43 days old at the time of harvest

<sup>c</sup>Dry weights were determined after drying for 7 days at 50°C.

<sup>d</sup>Values are means ± SD of measurements on 12 plants for rosettes and root systems, and for 15 plants for flowering stems

<sup>e</sup>Mutant value statistically significantly different from wild-type value,  $P = 0.04$ , Student's t-test)

<sup>f</sup>Mutant value statistically significantly different from wild-type value,  $P = 3 \times 10^{-11}$ , Student's t-test)

<sup>g</sup>n.d.: not determined

#### Supplemental Table S4.

Starvation marker genes used in this study.

Usadel et al. (2008) identified a set of specifically carbohydrate-responsive genes based on transcriptomic data from experiments in which plants were subjected to low carbon availability including sucrose starvation (Osuna et al., 2007), growth in low CO<sub>2</sub> levels (Bläsing et al., 2005) and extensions of the normal night period (Usadel et al., 2008). The analysis also included transcript profiles obtained from the *pgm* mutant that faces early carbon starvation during the night due to its inability to produce starch (Bläsing et al., 2005). Consequently, the classification as carbohydrate-responsive is not based on gene-function but on a common transcriptional response to changes in carbohydrate availability. We previously quantified transcript levels of carbohydrate-responsive genes to monitor the onset of carbon-starvation following the exhaustion of starch reserves in *Arabidopsis* rosettes (Graf et al., 2010).

Transcripts of all five genes studied here show no or very little change in abundance during a normal diurnal cycle but are rapidly induced or repressed under conditions of low-carbon availability such as extended night periods (see cited references).

| Gene      | Effect of sugars on expression | Annotation                                                          |
|-----------|--------------------------------|---------------------------------------------------------------------|
| At1g10070 | Repressed                      | Chloroplastic branched-chain amino acid aminotransferase (ATBCAT-2) |
| At1g76410 | Repressed                      | RING/FYVE/PHD-type zinc finger protein (ATL8),                      |
| At1g08630 | Repressed                      | Threonine aldolase (THA1)                                           |
| At3g59940 | Repressed                      | Kelch repeat-containing F-box family protein                        |
| At3g13470 | Induced                        | Chaperonin                                                          |

## Supplemental Table S5.

Primers used in this study.

| Experiment                                                                                | Primer sequences                                                                        |
|-------------------------------------------------------------------------------------------|-----------------------------------------------------------------------------------------|
| In situ hybridization: partial cDNA for <i>GSL7</i>                                       | 5'- ATGGCGAGTACTAGTAGTGGTGGAAGA-3'<br>5'-GGTCAACACGTTTCTAAAGACATCCTCAGTA-3'             |
| In situ hybridization: T3 (sense) and T7 (antisense) promoter sequences for 150 bp probe  | 5'-AATTAACCCTCACTAAAGGGCTAGTAGTGGTGGAA-3';<br>5'-TAATACGACTCACTATAGGGAAGAAGGAACAAGCT-3' |
| In situ hybridization: T3 (sense) and T7 (antisense) promoter sequences for 350 bp probe  | 5'-AATTAACCCTCACTAAAGGGATGGCGAGTACTAGT-3';<br>5'-TAATACGACTCACTATAGGGGTAATCTCTTCCTCC-3' |
| Identification of homozygous T-DNA insertion lines: <i>gs/7</i> (At1g06490 ) SALK_048921  | 5'-GCTTTACCAGATAGCGACAGTCTTGTATGA-3';<br>5'-GGTCAACACGTTTCTAAAGACATCCTCAGTA-3'          |
| Identification of homozygous T-DNA insertion lines: <i>gs/7</i> (At1g06490 ) SAIL_114_A01 | 5'-CAGAGTGGTGATATTGAAAGCGACAAGAA-3';<br>5'-CCTCCATGCAAAATCGTCCTTCCAAAGTAA-3'            |
| Identification of homozygous T-DNA insertion lines: T-DNA primer for SALK lines           | 5'-GCGTGGACCGCTTGCTGCAACT-3'                                                            |
| Identification of homozygous T-DNA insertion lines: T-DNA primer for SAIL line            | 5'-TAGCATCTGAATTTTCATAACCAATCTCGATACAC-3'                                               |
| <i>ACTIN2</i> (At3g18780) control for RT-PCR                                              | 5'-CTTCCTCAATCTCATCTTCT-3';<br>5'-TTAACATTGCAAAGAGTTTCAAGGT-3'                          |
| Real-time quantitative PCR analysis: <i>UBIQUITIN10</i>                                   | F5'- GGCTTGATAATCCCTGATGAATAAG-3';<br>R5'-AAAGAGATAACAGGAACGGAACATAGT-3'                |
| Real-time quantitative PCR analysis: At1g76410                                            | F5'-AGACGAGCTTAGGGTGTTGC-3';<br>R5'-CGCCACATTTATGACACCTG-3'                             |
| Real-time quantitative PCR analysis: At3g59940                                            | F5'-TGGAACGATGATGGTGAAGA-3';<br>R5'-AACCAGAGGGAGTGTTGACG-3'                             |
| Real-time quantitative PCR analysis: At1g10070                                            | F5'-ACCGGGGATGAATCTGTCT-3';<br>R5'-TCTGTGACCCATCCCTTGTT-3'                              |
| Real-time quantitative PCR analysis: At3g13470                                            | F5'-CCCGACAAAGGTTGTGAGAT-3';<br>R5'-TACCAGCAGGAAGTGGCTCT-3'                             |
| Real-time quantitative PCR analysis: At1g08630                                            | F5'-CTCCTTATCCGGGGAAACTC-3';<br>R5'-GGTTCCTGCATCGTTAGCAT-3'                             |
